1 Bisphenol-S and Bisphenol-F alter mouse pancreatic  $\beta$ -cell ion channel expression  
2 and activity and insulin release through an estrogen receptor ER $\beta$  mediated  
3 pathway

4 Laura Marroqui<sup>1,2</sup>, Juan Martinez-Pinna<sup>1,3</sup>, Manuel Castellano-Muñoz<sup>2</sup>, Reinaldo S. dos  
5 Santos<sup>1,2</sup>, Regla M. Medina-Gali<sup>1,2</sup>, Sergi Soriano<sup>1,3</sup>, Ivan Quesada<sup>1,2</sup>, Jan-Ake Gustafsson<sup>4,5</sup>,  
6 José A. Encinar<sup>1</sup> and Angel Nadal<sup>1,2,\*</sup>.

7 1. Instituto de Investigación, Desarrollo e Innovación en Biotecnología Sanitaria de Elche (IDiBE),  
8 Universitas Miguel Hernández, Elche, Spain.

9 2. Centro de Investigación Biomédica en Red de Diabetes y Enfermedades Metabólicas Asociadas  
10 (CIBERDEM), Spain.

11 3. Departamento de Fisiología, Genética y Microbiología, Universidad de Alicante, Alicante,  
12 Spain.

13 4. Department of Cell Biology and Biochemistry, Center for Nuclear Receptors and Cell Signaling,  
14 University of Houston, Houston, TX, USA.

15 5. Department of Biosciences and Nutrition, Karolinska Institutet, Huddinge, Sweden

16

17

18 KEYWORDS: Bisphenol, Islet of Langerhans, Endocrine Disrupting Chemicals, Estrogen  
19 Receptors, Molecular Dynamics Simulation

20

21 ABSTRACT

22 Bisphenol-S (BPS) and Bisphenol-F (BPF) are current Bisphenol-A (BPA) substitutes. Here we  
23 used pancreatic  $\beta$ -cells from wild type (WT) and estrogen receptor  $\beta$  (ER $\beta$ ) knockout (BERKO)  
24 mice to investigate the effects of BPS and BPF on insulin secretion, and the expression and activity  
25 of ion channels involved in  $\beta$ -cell function. BPS or BPF rapidly increased insulin release and  
26 diminished ATP-sensitive K<sup>+</sup> (K<sub>ATP</sub>) channel activity. Similarly, 48 h treatment with BPS or BPF  
27 enhanced insulin release and decreased the expression of several ion channel subunits in  $\beta$ -cells  
28 from WT mice, yet no effects were observed in cells from BERKO mice. PaPE-1, a ligand  
29 designed to preferentially trigger extranuclear-initiated ER pathways, mimicked the effects of  
30 bisphenols, suggesting the involvement of extranuclear-initiated ER $\beta$  pathways. Molecular  
31 dynamics simulations indicated differences in ER $\beta$  ligand-binding domain dimer stabilization and  
32 solvation free energy among different bisphenols and PaPE-1. Our data suggest a mode of action  
33 involving ER $\beta$  whose activation alters three key cellular events in  $\beta$ -cell, namely ion channel  
34 expression and activity, and insulin release. These results may help to improve the hazard  
35 identification of bisphenols.

## 36 INTRODUCTION

37 The relationship between BPA exposure and hormone related diseases (Gore et al., 2015) has  
38 raised consumers concern. Consequently, BPA has been progressively substituted by other  
39 bisphenol analogs. Among the nearly 15 bisphenol analogs, BPS and BPF are widely consumed  
40 and commercialized (Rochester and Bolden, 2015), being the major bisphenol contaminants in  
41 indoor dust along with BPA (Liao et al., 2012b). Similar to BPA, the detection frequencies of BPS  
42 and BPF were approximately 80% in urine samples collected from the general United States  
43 population and several Asian countries (Liao et al., 2012a; Ye et al., 2015). In the United States  
44 population, the detection frequency of BPS in urine has increased between 2000 and 2014 while  
45 that of BPA trends to decrease since 2010. BPA had a frequency and geometric mean  
46 concentrations of 74–99% and 0.36–2.07  $\mu\text{g/L}$ , followed by BPF 42–88%, 0.15–0.54  $\mu\text{g/L}$  and  
47 BPS, 19–74%, < 0.1–0.25  $\mu\text{g/L}$  (Ye et al., 2015). BPA has a tolerable daily intake (TDI)  
48 determined by the European Food Safety Authority in 2015 of 4  $\mu\text{g/kg-day}$  and in 2017 it was  
49 identified by the European Chemical Agency as a substance of very high concern due to its  
50 endocrine disrupting properties (Beausoleil et al., 2018). Of note, TDIs for other bisphenols do not  
51 yet exist.

52 BPA has been considered a risk factor in the etiology of type 2 diabetes (T2D) (Alonso-Magdalena  
53 et al., 2006; Ropero et al., 2008; Nadal et al., 2009; Batista et al., 2012). Epidemiological and  
54 prospective studies associated BPA exposure with alterations in glucose homeostasis or T2D  
55 incidence, independently of obesity or other traditional factors (Lang et al., 2008; Shankar and  
56 Teppala, 2011; Beydoun et al., 2014; Ranciere et al., 2019). Recent epidemiological data  
57 associated BPS urine levels with T2D development in a case-cohort study (Ranciere et al., 2019)

58 and a case-control study (Duan et al., 2018). BPF has been recently associated with abdominal  
59 obesity in children (Jacobson et al., 2019), but association with T2D is still unclear.  
60 T2D occurs due to a progressive loss of sufficient  $\beta$ -cell insulin secretion frequently on the  
61 background of insulin resistance (American Diabetes, 2018). The use of animal and cellular  
62 models indicated a link between BPA exposure and diabetes development (Nadal et al., 2009;  
63 Alonso-Magdalena et al., 2011; Le Magueresse-Battistoni et al., 2018). Adult male mice exposed  
64 to environmentally relevant doses of BPA presented insulin resistance and hyperinsulinemia in fed  
65 state (Alonso-Magdalena et al., 2006; Batista et al., 2012). Furthermore, BPA directly affected  $\beta$ -  
66 cell function (Quesada et al., 2002; Alonso-Magdalena et al., 2008; Soriano et al., 2012; Martinez-  
67 Pinna et al., 2019). Pancreatic  $\beta$ -cells are excitable cells and, therefore, their electrical activity  
68 rules stimulus-secretion coupling. A primary event in the mechanism of insulin release is the  
69 blockade of the ATP-sensitive  $K^+$  ( $K_{ATP}$ ) channels, which control  $\beta$ -cell resting membrane  
70 potential. This blockade leads to a typical electrical activity pattern consisting of bursts of action  
71 potentials produced by the opening of voltage-gated,  $Ca^{2+}$ ,  $Na^+$  and  $K^+$  channels, as well as a rise  
72 in intracellular  $Ca^{2+}$ , which culminates in insulin exocytosis (Rorsman and Ashcroft, 2018).  
73 Changes in the expression and/or function of these ion channels result in altered insulin secretion  
74 and constitute a serious risk factor for T2D (Hiriart et al., 2014; Jacobson and Shyng, 2020).  
75 Even though BPA may act through different modes of action, it is considered a xenoestrogen able  
76 to bind to  $ER\beta$  and  $ER\alpha$  (Wetherill et al., 2007). Both ERs exert their actions through nuclear- and  
77 extranuclear-initiated pathways. The nuclear-initiated pathway consists of the direct binding of the  
78 ligand bound-ERs to estrogen response elements, which are located in the regulatory regions of  
79 ER target genes (Smith and O'Malley, 2004; Heldring et al., 2007). Transcriptional regulation also  
80 occurs through tethering of ERs to DNA-bound transcription factors AP-1 and Sp-1 (Ascenzi et

81 al., 2006). Conversely, extranuclear-initiated pathways involve the activation of intracellular  
82 signaling cascades that will lead to different effects, including transcriptional regulation (Levin  
83 and Hammes, 2016). Although the role of extranuclear-initiated events triggered by environmental  
84 estrogens remains poorly understood, rodent models and human studies indicate that this pathway  
85 may be important to initiate effects at low doses (Alonso-Magdalena et al., 2008; Vinas and  
86 Watson, 2013; Acconcia et al., 2015; Nadal et al., 2018).

87 In  $\beta$ -cells, nanomolar (1-10nM) concentrations of BPA rapidly (within 10 minutes) block  $K_{ATP}$   
88 channels and enhance glucose-stimulated insulin secretion (GSIS) in an  $ER\beta$ -dependent  
89 mechanism (Soriano et al., 2009; Soriano et al., 2012). Longer exposures to BPA (48 hours)  
90 regulate gene expression of  $Ca^{2+}$ ,  $Na^{+}$  and  $K^{+}$  channels, altering electrical activity,  $Ca^{2+}$  signaling,  
91 and insulin release (Villar-Pazos et al., 2017; Martinez-Pinna et al., 2019). In addition, BPA  
92 exposure for 48 h also increases  $\beta$ -cell division in vivo as well as in primary cells. These effects  
93 are mimicked by  $ER\beta$  agonists and abolished in cells from  $ER\beta$  knockout mice (BERKO), which  
94 do not express  $ER\beta$  in  $\beta$ -cells, suggesting that  $ER\beta$  activation is necessary for BPA effects in  
95 pancreatic  $\beta$ -cells (Boronat-Belda et al., 2020).

96 Here we studied BPS and BPF effects on insulin release, and ion channel expression and activity  
97 in  $\beta$ -cells from wild type (WT) and BERKO mice. Because evidence suggested an important role  
98 of  $ER\beta$  via an extranuclear-initiated pathway, we compared effects elicited by bisphenols with  
99 those induced by Pathway Preferential Estrogen-1 (PaPE-1), a compound that binds to ERs and  
100 acts preferentially through extranuclear-initiated pathways (Madak-Erdogan et al., 2016).  
101 Additionally, we performed molecular docking and dynamic simulations of bisphenols, PaPE-1  
102 and E2 bound to the  $ER\beta$  ligand-binding domain (LDB) to evaluate the consistencies and variances  
103 among these ligands at the molecular level.

104

## 105 MATERIALS AND METHODS

### 106 **Chemical substances**

107 Bisphenol-A was obtained from MP Biomedicals (Cat No 155118; Santa Ana, CA, USA). BPS  
108 (Cat No 103039), BPF (Cat No 51453), PaPE-1 (Cat No SML1876), and collagenase (Cat No  
109 C9263) were obtained from Sigma-Aldrich (Barcelona, Spain). Bisphenols and PaPE-1 were  
110 weekly prepared by dissolution in DMSO (used as vehicle).

111 **Animals, islet culture and dispersed islet cells** All adult male mice were kept under standard  
112 housing conditions (12 h light/dark cycle, food *ad libitum*). BERKO mice were generated as  
113 described previously (Krege et al., 1998) and supplied by Jan-Ake Gustafsson's laboratory. Both  
114 WT littermates and BERKO mice were acquired from the same supplier and colony. Mice were  
115 sacrificed and islets were isolated as previously described (Nadal and Soria, 1997). For patch-  
116 clamp experiments, islets were dispersed into single cells and plated on glass coverslips as  
117 described before (Valdeolmillos et al., 1992). Cells were kept at 37 °C in a humidified atmosphere  
118 of 95% O<sub>2</sub> and 5% CO<sub>2</sub> and used within 48 h of culture. Experimental procedures were performed  
119 according to the Spanish Royal Decree 1201/2005 and the European Community Council directive  
120 2010/63/EU. The ethical committee of Miguel Hernandez University reviewed and approved the  
121 methods used herein (approvals ID: UMH-IB-AN-01-14 and UMH-IB-AN-02-14).

122 **Glucose-stimulated insulin secretion (GSIS)** GSIS was performed in islets as previously  
123 described (Santin et al., 2016) with slight changes. Briefly, islets were preincubated for 1 h in  
124 glucose-free Krebs-Ringer solution. Afterward, islets were sequentially stimulated with 2.8, 8.3,  
125 and 16.7 mM glucose for 1 h either in the presence or absence of treatments (as described in Figure  
126 1). Insulin release and insulin content were measured in islet-free supernatants and acid ethanol-

127 extracted islets lysates, respectively, using a mouse insulin ELISA kit (Merckodia, Uppsala,  
128 Sweden).

129 **Patch-clamp recordings**  $K_{ATP}$  channel activity was recorded using standard patch-clamp  
130 recording procedures from isolated  $\beta$ -cells as described previously (Valdeolmillos et al., 1992;  
131 Vettorazzi et al., 2016). Around 80-90% of the single cells were identified as  $\beta$ -cells. Currents  
132 were recorded using an Axopatch 200B patch-clamp amplifier (Axon Instruments Co. CA, USA).  
133 Patch pipettes were pulled from borosilicate capillaries (Sutter Instruments Co. CA, USA) using a  
134 flaming/brown micropipette puller P-97 (Sutter Instruments Co. CA, USA) with resistance  
135 between 3–5 M $\Omega$  when filled with the pipette solutions as specified below. Bath solution contained  
136 (in mM): 5 KCl, 135 NaCl, 2.5 CaCl<sub>2</sub>, 10 Hepes and 1.1 MgCl<sub>2</sub> (pH 7.4) and supplemented with  
137 glucose as indicated. The pipette solution contained (in mM): 140 KCl, 1 MgCl<sub>2</sub>, 10 Hepes and 1  
138 EGTA (pH 7.2). The pipette potential was held at 0 mV throughout recording.  $K_{ATP}$  channel  
139 activity was quantified by digitizing 60 s sections of the current record, filtered at 1 kHz, sampled  
140 at 10 kHz by a Digidata 1322A (Axon Instruments Co. CA, USA), and calculating the mean open  
141 probability of the channel ( $NP_o$ ) during the sweep. Channel activity was defined as the product of  
142  $N$ , the number of functional channels, and  $P_o$ , the open-state probability.  $P_o$  was determined by  
143 dividing the total time channels spent in the open state by the total sample time.

144 For the patch-clamp recordings of voltage-gated Ca<sup>2+</sup> currents, the whole-cell patch-clamp  
145 configuration was used as described previously (Villar-Pazos et al., 2017). Pancreatic  $\beta$ -cells were  
146 identified by size (>5 pF) and the corresponding steady-state inactivation properties of the  
147 tetrodotoxin (TTX)-sensitive Na<sup>+</sup> current. Data were obtained using an Axopatch 200B patch-  
148 clamp amplifier (Axon Instruments Co. CA, USA). Patch pipettes were pulled from borosilicate  
149 capillaries (Sutter Instruments Co. CA, USA) using a flaming/brown micropipette puller P-97

150 (Sutter Instruments Co. CA, USA) and heat polished at the tip using an MF-830 microforge  
151 (Narishige, Japan). The bath solution contained 118 mM NaCl, 20 mM TEA-Cl, 5.6 mM KCl, 2.6  
152 mM CaCl<sub>2</sub>, 1.2 mM MgCl<sub>2</sub>, 5 mM HEPES and 5 mM glucose (pH 7.4 with NaOH). The pipette  
153 solution consisted of 130 mM CsCl, 1 mM CaCl<sub>2</sub>, 1 mM MgCl<sub>2</sub>, 10 mM EGTA, 3 mM MgATP  
154 and 10 mM HEPES (pH 7.2 with CsOH). After filling the pipette with the pipette solution, the  
155 pipette resistance was 3–5 MΩ. A tight seal (>1 GΩ) was established between the β-cell membrane  
156 and the tip of the pipette by gentle suction. The series resistance of the pipette usually increased to  
157 6–15 MΩ after moving to whole-cell. Series resistance compensation was used (up to 70%) for  
158 keeping the voltage error below 5 mV during current flow. Voltage-gated Ca<sup>2+</sup> currents were  
159 compensated for capacitive transients and linear leak using a -P/4 protocol. Data were filtered (2  
160 kHz) and digitized (10 kHz) using a Digidata 1322 A (Axon Instruments Co. CA, USA) and stored  
161 in a computer for subsequent analysis using commercial software (pClamp9, Axon Instruments  
162 Co. CA, USA). Experiments were carried out at 32–34 °C.

163 **Quantitative real-time PCR** Total RNA was isolated using the RNeasy Micro Kit (Qiagen) and  
164 reverse-transcribed using the High Capacity cDNA Reverse Transcription Kit (Applied  
165 Biosystems). Quantitative PCR was performed using the CFX96 Real Time System (Bio-Rad,  
166 Hercules, CA) as described previously (Villar-Pazos et al., 2017). *Hprt* was used as housekeeping  
167 gene. The CFX Manager Version 1.6 (Bio-Rad) was used to analyse the values, which were  
168 expressed as relative expression ( $2^{-\Delta\Delta C_t}$ ). The primers used herein have been previously described  
169 (Martinez-Pinna et al., 2019).

170 **Molecular docking and dynamics simulations** Crystallographic structure of the rat ERβ LBD in  
171 complex with pure antiestrogen ICI 164,384 [rERβ-ΔH12-LBD; UniProt code: Q62986, Protein  
172 Data Bank (PDB) code: 1HJ1] was used for molecular docking and long-time dynamic (1 μs)



173 simulation purposes. The missing residues in the 1HJ1 structure (364-377) and the missing side  
174 chains (M242, K255, K269, E326, S363, S378, R379, K380 and K435) were reconstructed after  
175 generating a homology model at the Swiss-Model server (Biasini et al., 2014; Galiano et al., 2016).  
176 Structure of estradiol-bound rat ER $\beta$  LBD in complex with LXXLL motif from NCOA5 (rER $\beta$ -  
177 LBD; UniProt code: Q62986, PDB code: 2J7X) was used for molecular docking and short-time  
178 dynamic (100 ns) simulation purposes. The missing residues in the 2J7X structure (239-241 and  
179 369-374) and the missing side chains (V237, M242, K255, E376, R374, K398, and K426) were  
180 reconstructed after generating a homology model at Swiss-Model server (Biasini et al., 2014;  
181 Galiano et al., 2016) using the 2J7X structure as a template. Molecular docking and dynamics  
182 simulations were carried out using YASARA structure v19.9.17 software as previously described  
183 (Encinar et al., 2015; Galiano et al., 2016; Ruiz-Torres et al., 2018). The ligand-protein interactions  
184 have been detected with the Protein–Ligand Interaction Profiler (FLIP) algorithm (Salentin et al.,  
185 2015). Foldx 5.0-calculated (Delgado et al., 2019) was used for frequency distributions of  
186 intermolecular protein interaction energy for the subunits of the rER $\beta$ - $\Delta$ H12-LBD dimer in the  
187 presence of different ligands in each LBD cavity (Figure S5).

188 **Data analysis** The GraphPad Prism 7.0 software (GraphPad Software, La Jolla, CA, USA) was  
189 used for statistical analyses. Data are presented as the mean  $\pm$  SEM. Statistical analyses were  
190 performed using Student's t-test or one-way ANOVA. p values  $\leq$  0.05 were considered statistically  
191 significant.

192

193

## 194 RESULTS

### 195 **BPS and BPF affect insulin release**

196 Previous data indicate that treatment with 1 nM BPA rapidly enhances insulin secretion in islets  
197 from mice and humans (Alonso-Magdalena et al., 2006; Soriano et al., 2012). To investigate  
198 whether BPS and BPF would have similar effects, we treated islets during 1 h with two  
199 concentrations of BPS and BPF (1 nM and 1  $\mu$ M), and we measured insulin release in response to  
200 different glucose concentrations (2.8, 8.3 and 16.7 mM). Exposure to 1 nM and 1  $\mu$ M BPS  
201 enhanced GSIS at stimulatory glucose concentration, mainly at 16.7 mM (**Figure 1A**). Regarding  
202 BPF, we observed a slight increase at 1 nM that was significant only in the presence of 16.7 mM  
203 glucose. BPF 1  $\mu$ M, however, increased GSIS at both 8.3 and 16.7 mM glucose (**Figure 1B**). We  
204 used BPA as a positive control and 1 nM BPA increased GSIS, as expected (**Figure S1A**). Of note,  
205 insulin content remained unchanged upon treatment with BPS, BPF, and BPA (**Figure S1C-E**).

206 Longer BPA treatment (48 h) induced insulin hypersecretion in response to stimulatory glucose  
207 concentrations (Alonso-Magdalena et al., 2008; Villar-Pazos et al., 2017). We then investigated  
208 whether treatment with BPS or BPF during 48 h would also change GSIS. BPS at 1 nM and 1  $\mu$ M  
209 enhanced insulin secretion in response to 8.3 mM glucose. However, when glucose concentration  
210 was increased to 16.7 mM, BPS was effective at 1 nM but ineffective at 1  $\mu$ M (**Figure 1C**). When  
211 the same experiment in Figure 1C was performed with BPF, we only observed a potentiation of  
212 insulin release at 1  $\mu$ M at stimulatory glucose concentrations (**Figure 1D**), which indicated a more  
213 potent action of BPS compared to BPF. Treatment with BPA, BPS or BPF did not modify insulin  
214 content (**Figure S1F-H**).

### 215 **BPS and BPF diminish $K_{ATP}$ channel activity via ER $\beta$**

216 We have previously demonstrated that acute BPA treatment potentiated GSIS after decreasing  
217  $K_{ATP}$  channel activity (Soriano et al., 2012). Moreover, BPA effects, which were not observed in  
218 cells from BERKO mice, were reproduced by the endogenous ligand, 17 $\beta$ -estradiol (E2), as well  
219 as the ER $\beta$  agonist diarylpropionitrile (DPN) (Soriano et al., 2009; Soriano et al., 2012). Acute  
220 treatment with BPS induced a rapid increase in heart rate in response to catecholamines (Gao et  
221 al., 2015). BPS also rapidly depressed left ventricular contraction and myocyte contractility  
222 (Ferguson et al., 2019). In both cases, the ER $\beta$  antagonist PHTPP abolished BPS actions,  
223 suggesting the involvement of ER $\beta$  (Gao et al., 2015; Ferguson et al., 2019).

224 To assess whether acute exposure to BPS or BPF would modulate  $K_{ATP}$  channel activity, we  
225 performed patch-clamp recordings in the cell-attached mode in dispersed  $\beta$ -cells from WT and  
226 BERKO mice (**Figure 2**). Treatment with 1 nM BPS during 10 minutes was enough to decrease  
227  $K_{ATP}$  channel activity by 35% (**Figure 2A,B**), whereas no effects were observed in cells from  
228 BERKO mice (**Figure 2A,C**). A similar experiment was performed using 1 nM and 10 nM BPF.  
229 While 1 nM BPF did not modify  $K_{ATP}$  channel activity in  $\beta$ -cells from WT and BERKO (data not  
230 shown), 10 nM BPF decreased  $K_{ATP}$  channel activity in cells from WT (**Figure 2D**) but not in cells  
231 from BERKO mice (**Figure 2E**). These findings indicate that the rapid GSIS enhancement  
232 observed in **Figure 1A** may be a consequence of bisphenol-induced  $K_{ATP}$  channels closure.

233 The fact that this is a rapid action, occurring minutes upon treatment, indicates that low  
234 concentrations of bisphenols trigger a non-genomic action via an extranuclear-initiated pathway,  
235 likely by binding to ER $\beta$ . To test this hypothesis we used PaPE-1, a new ER $\alpha$  and ER $\beta$  ligand that  
236 acts preferentially through extranuclear-initiated pathways (Madak-Erdogan et al., 2016).  
237 Treatment with 1  $\mu$ M PaPE-1 decreased  $K_{ATP}$  channel activity in cells from WT mice (**Figure 2F**)  
238 but had no effect in cells from BERKO mice (**Figure 2G**). Of note, 1 nM PaPE-1 did not change

239  $K_{ATP}$  channel activity (data not shown). These results emphasize that PaPE-1 triggers a rapid  
240 extranuclear-initiated pathway via  $ER\beta$  in  $\beta$ -cells.

### 241 **Bisphenols downregulate ion channel subunits gene expression**

242 Stimulus-secretion coupling in  $\beta$ -cells depends on the electrical activity generated by ion channels.  
243 BPA treatment for 48 h decreased the mRNA expression of genes encoding  $Ca^{2+}$  (*Cacnale*),  $K^+$  (  
244 *Kcnma1* and *Kcnip1*) and  $Na^+$  (*Scn9a*) channel subunits, which might explain, at least in part, the  
245 BPA-induced alteration in GSIS (Villar-Pazos et al., 2017; Martinez-Pinna et al., 2019). In Figure  
246 3 A,E,I) we used BPA as a control to probe that in this preparation it decreased *Cacnle*, *Kcnma1*,  
247 *Kcnip* and *Scn9* as already described (Villar-Pazos et al., 2017; Martinez-Pinna et al., 2019). We  
248 found that BPS modulated *Cacnale* mRNA expression in a non-monotonic dose response  
249 (NMDR)-dependent manner: exposure to 1 nM BPS reduced *Cacnale* mRNA expression by 50%,  
250 while exposure to 100 nM and 1  $\mu$ M did not significantly change *Cacnale* expression (**Figure**  
251 **3B**). This BPS-induced decrease in *Cacnale* expression at 1 nM was associated to a reduction in  
252  $Ca^{2+}$  currents in cells from WT (**Figure S2A,C,I**), but not in cells from BERKO (**Figure S2B,D,I**)  
253 mice. Of note, 100 nM and 1  $\mu$ M BPS did not modify  $Ca^{2+}$  currents in cells from WT or BERKO  
254 mice (**Figure S2**). It is very likely that the decrease in  $Ca^{2+}$  currents induced by 1 nM BPS is a  
255 consequence of *Cacnale* gene downregulation because both follow the same dose pattern.  
256 Regarding BPF, *Cacnale* mRNA expression was not changed by treatment with 1 nM BPF for 48  
257 h, but it was decreased upon exposure to 100 nM and 1  $\mu$ M BPF (**Figure 3C**). Measurement of  
258  $Ca^{2+}$  currents showed that only exposure to 1  $\mu$ M BPF significantly decreased  $Ca^{2+}$  currents in  
259 cells from WT mice (**Figure S3A,G,I**), while no effects were observed in cells from BERKO mice  
260 (**Figure S3B,H,J**). Once again, we used PaPE-1 to study the possible involvement of an  
261 extranuclear-initiated pathway in the regulation of *Cacnale* expression. Treatment with 1  $\mu$ M

262 PaPE-1 decreased *Cacnale* expression (**Figure 3D**), which indicates that this gene can be  
263 regulated by a signaling pathway initiated outside the nucleus.

264 Like what we observed for *Cacnale* expression, *Kcnmal* (**Figure 3E-H**), *Kcnipl* (**Figure 3I-L**),  
265 and *Scn9a* (**Figure 3M-P**) mRNA expression was downregulated by BPA, BPS, BPF and PaPE-  
266 1. BPS decreased *Kcnmal*, *Kcnipl*, and *Scn9a* at 1 nM in an NMDR manner, while BPF and PaPE-  
267 1 were effective at 1  $\mu$ M (**Figure 3**).

268 As a negative control, we used 4,4'-(9-fluorenylidene)diphenol, BPFL (also named BHPF), which  
269 binds to the androgen receptor and acts as an antiestrogen (Zhang et al., 2017; Keminer et al.,  
270 2019). As expected, BPFL treatment at different concentrations did not change ion channel gene  
271 expression or  $Ca^{2+}$  currents (**Figure S4**).

272 Overall, these results demonstrate that BPS decreased the transcription of ion channel subunits at  
273 concentrations as low as 1 nM, while BPF needed higher concentrations (100 nM and 1  $\mu$ M) to  
274 decrease the expression of the same genes. This effect was mimicked by PaPE-1, suggesting that  
275 bisphenols may regulate gene expression via extranuclear ERs.

276 We previously used  $\beta$ -cells from BERKO mice as well as the ER $\beta$  ligand DPN to study the role of  
277 ER $\beta$  on the regulation of ion channel subunit gene expression induced by BPA (Villar-Pazos et  
278 al., 2017; Martinez-Pinna et al., 2019). To evaluate whether ER $\beta$  would also play a role in BPS-  
279 and BPF-induced regulation of ion channel expression, we incubated islets from WT and BERKO  
280 mice with 1 nM BPS or 1  $\mu$ M BPF for 48 h. Similarly, to the results depicted in **Figure 3**, both 1  
281 nM BPS and 1  $\mu$ M BPF decreased *Cacnale*, *Kcnmal* and *Scn9a* mRNA expression in islets from  
282 WT mice (**Figure 4 A-C**). This decrease, however, was abolished in islets from BERKO mice  
283 (**Figure 4 D-F**). Notably, 1  $\mu$ M BPF increased *Cacnale* expression in BERKO mice, suggesting  
284 a role for receptors other than ER $\beta$  in the regulation of this gene.

285 **Molecular dynamics simulations of bisphenols bound to the rat ER $\beta$  LBD cavity.**

286 To investigate potential modifications in bisphenols and PaPE-1 binding to ER $\beta$  ligand binding  
287 domain (LBD) that might help to, at least partially, explain the different biological activity of  
288 bisphenols observed herein, we performed computational analyses of molecular docking and  
289 dynamics simulations.

290 Despite the numerous studies using human ER $\alpha$  structures on molecular dynamics simulations  
291 (Celik et al., 2007; Fratev, 2015; Chen et al., 2016; Jereva et al., 2017; Li et al., 2018; Shtaiwi et  
292 al., 2018), the ER $\beta$  isoform has not yet been analyzed. Furthermore, ER $\alpha$  LBD and ER $\beta$  LBD have  
293 not been crystallized in mice, even though the resolved rat structure is well known. Because rat  
294 and mouse ER $\beta$  LBD sequences differ by only 3 amino acids, including two conservative  
295 mutations (**Figure S5A,B**), we chose to use rat structures in our analyses. A recent study using E2,  
296 BPA, BPS and BPAF indicated that the root mean square deviation (RMSD) values calculated  
297 from the heavy atoms of the ligands might be an important parameter to analyze ligand dynamics  
298 particularly implicated in nuclear-initiated events (Li et al., 2018). Therefore, to evaluate if our  
299 results fixed with a classic nuclear initiated event, we first studied molecular dynamics simulation  
300 of the transactivation helix (H12) closed rER $\beta$ -LBD. The natural ligand E2 showed no deviations  
301 from the starting configuration for over 100 ns (**Figure S6**), whereas deviations reached 2 Å in the  
302 presence of the Src coactivator peptide (**Figure S6**). Meanwhile, rearrangements in conformations  
303 are evident from the ligand heavy atom RMSDs in all three bisphenols. In addition, we observed  
304 that BPA and BPF showed rapid variations due to faster ring-flipping dynamics (**Figure S6A-C**),  
305 similarly to what has been previously shown (Li et al., 2018). The repositioning of H12 in the  
306 "mouse trap" conformation decisively influences the MM/PBSA solvation binding energy (Celik  
307 et al., 2007). We observed that the solvation binding energy for E2 and BPA was higher than that

308 for BPS and BPF (**Figure S7**). Interestingly, BPS presented the lowest solvation binding energy  
309 value; thus, BPS should bind with lower affinity than BPF and BPA to this configuration, as  
310 experimentally demonstrated for the nuclear-initiated pathway (Molina-Molina et al., 2013). These  
311 results contrast with the order in biological activity described herein, where we find regulation of  
312 ion channel gene expression with at least 100-fold lower concentrations of BPS than BPF.  
313 Therefore, a different mechanism to the classic nuclear-initiated event involved in the regulation  
314 of ion channel activity and gene expression in  $\beta$ -cells might be implicated in BPS and BPF effects.  
315 We then sought to study differences and similarities among E2, BPA, BPS, BPF, and PaPE-1,  
316 using what we named rER $\beta$ - $\Delta$ H12-LBD (PDB code: 1HJ1; (Pike et al., 2001)) dimer complex, and  
317 performing long-time (1  $\mu$ s) molecular dynamics simulations (**Figure 5A**). In the rER $\beta$ - $\Delta$ H12-  
318 LBD complex, binding of the antiestrogen ICI 164,384 abrogates the association between H12 and  
319 the remainder of the LBD, and inhibits both of ER's transactivation functions (AF1 and AF2) (Pike  
320 et al., 2001). BPA does not stabilize ER $\alpha$  in a conformation that initiates nuclear events because  
321 BPA does not stabilize H12 (Delfosse et al., 2012). Then, simulating binding to rER $\beta$ - $\Delta$ H12-LBD  
322 dimer complex should be convenient to study extranuclear-initiated events.  
323 Dimerization has been demonstrated to be necessary for ERs-mediated extranuclear responses  
324 (Razandi et al., 2004; Levin and Hammes, 2016). In our model, BPA, BPS and E2 showed similar  
325 frequency distributions of intermolecular protein interaction for both subunits of the dimers,  
326 whereas BPF and PaPE-1 presented lower frequency distribution (**Figure 5B**). This suggests a  
327 higher stability of the dimers with BPA, BPS and E2. Trajectories of the ligands docked in the  
328 LBD cavities (RMSD, Å) are similar except for PaPE-1 (**Figure 5C**), which left the open cavity  
329 of the LBD in both subunits after 700 ns (**Figure 5C**) and 840 ns (**Figure 5D**). For E2 and  
330 bisphenols, rearrangements rarely exceed 6 Å, indicating that the movement of the ligands into the

331 cavity is limited, even when H12 is not closing the cavity. Notably, PaPE-1 MM/PBSA solvation  
332 binding free energy values, 60 kcal/mol (**Figure 5E**) and 65 kcal/mol (**Figure 5F**), indicate that  
333 this compound binds to the protein strongly than bisphenols and E2. On the other hand, bisphenols  
334 and E2 remain inside the cavity throughout the entire 1  $\mu$ s molecular dynamics simulation. We  
335 found very similar MM/PBSA solvation binding free energy values for E2 and BPA (around 55  
336 kcal/mol), whereas BPS and BPF presented lower values (45 and 38 kcal/mol, respectively)  
337 (**Figure 5E,F**). The solvation binding energies correlated with the number of hydrogen bonds  
338 between the protein and the solvent (**Figure 5G**). BPF presented the lowest solvation binding  
339 energy (**Figure 5E,F**) as well as the lowest number of hydrogen bonds (around 680 H-bonds,  
340 **Figure 5G**). These results indicate that BPF and PaPE-1 stabilize the ER $\beta$ -LBD dimer to a lesser  
341 extent than E2, BPA and BPS, which correlates with the lower biological activity observed for  
342 BPF and PaPE-1 in the present study. Therefore, we hypothesize that binding of bisphenols to the  
343 ERs induces a conformational change that favors an extranuclear-initiated action after dimerization  
344 of ER $\beta$ .

345

## 346 DISCUSSION

347 In the present study we found that acute and long-term exposure of primary male mouse  $\beta$ -cells to  
348 BPS and BPF led to alterations in  $\beta$ -cell physiology across different levels of biological  
349 complexity, including K<sub>ATP</sub> channel activity, Na<sup>+</sup>, K<sup>+</sup> and Ca<sup>2+</sup> channel subunits expression, and  
350 glucose-stimulated insulin release.

351 Although BPS and BPF have been used as alternatives to BPA, these chemicals may share some  
352 of the effects induced by BPA due to their similar structure (Malaise et al., 2020; Mustieles et al.,



353 2020) or induce different effects to BPA (Kolla et al., 2018). We observed that, similarly to BPA,  
354 BPS and BPF enhanced GSIS either after acute treatment (1 h) or upon exposure for 48 h.  
355 The acute effect occurs at the two doses tested, 1 nM and 1  $\mu$ M, and showed glucose dependence.  
356 Bisphenols had no effects at a non-stimulatory glucose concentration (3 mM), had a moderate  
357 effect at intermediate glucose concentration (8.3 mM), and had a stronger effect at high glucose  
358 (16.7 mM). This potentiation was likely a consequence of the blockade of  $K_{ATP}$  channels  
359 demonstrated using patch-clamp experiments in the cell-attached mode. In  $\beta$ -cells,  $K_{ATP}$  channels  
360 control the resting membrane potential. As a result of glucose metabolism, the rise in the ratio  
361 ATP/ADP blocks  $K_{ATP}$  channels and depolarizes the plasma membrane, thus initiating the  
362 electrical activity in burst of action potentials that culminates in insulin release. Here we show that  
363 BPS- and BPF-induced blockade of  $K_{ATP}$  channels seems to potentiate the effect of glucose on  
364 insulin secretion, which leads to insulin hypersecretion.  
365 The rapid BPA-induced potentiation of GSIS has been demonstrated in primary mouse and human  
366  $\beta$ -cells (Soriano et al., 2012). In addition, oral BPA administration rapidly altered insulin and C-  
367 peptide levels in blood of adult individuals (Stahlhut et al., 2018; Hagobian et al., 2019). As in the  
368 present work BPS and BPF act akin to BPA in  $\beta$ -cells, an analogous effect on human cells might  
369 be expected. It is difficult to predict how this rapid action relates to the development of metabolic  
370 disorders. Pancreatic  $\beta$ -cells acutely exposed to bisphenols secrete more insulin than untreated  
371 cells, which may result in supraphysiological insulin signaling in some target tissues, such as  
372 adipose tissue.  
373 Although human evidence are still scarce, BPS has been linked to T2D (Ranciere et al., 2019),  
374 while BPS and BPF urine levels have been associated with the prevalence of obesity in children  
375 (Jacobson et al., 2019; Liu et al., 2019). In any case, bisphenol-induced insulin hypersecretion may

376 be one of the altered processes contributing to insulin resistance, which represents a risk factor for  
377 both T2D and obesity (Alonso-Magdalena et al., 2006; Corkey, 2012; Erion and Corkey, 2017).  
378 BPS and BPF trigger their rapid actions at concentrations as low as 1 nM. In the presence of 16.7  
379 mM glucose, both 1 nM BPS and BPF increased insulin secretion. However, in the presence of 8.3  
380 mM glucose 1 nM BPS potentiated GSIS, while 1 nM BPF did not affect insulin release. These  
381 findings indicate that BPF has a slightly lower potency than BPS, which is manifested by the lack  
382 of BPF effect at 1 nM on  $K_{ATP}$  channel activity. The difference in potency seems to be small since  
383 10 nM BPF blocked  $K_{ATP}$  channel activity to a similar extent as 1 nM BPS. Remarkably, bisphenol-  
384 induced blockade of  $K_{ATP}$  channels was abolished in cells from BERKO mice. BERKO mice  $\beta$ -  
385 cells do not express ER $\beta$  (Boronat-Belda et al., 2020). Our previous studies demonstrated that 1  
386 nM of E2, DPN, or BPA similarly affected  $K_{ATP}$  channel activity (Soriano et al., 2009; Soriano et  
387 al., 2012). These data suggest that ER $\beta$  activation blocks  $K_{ATP}$  channels and that binding to ER $\beta$   
388 may mediate the acute action of bisphenols. It is unlikely that this fast response, reached in only  
389 10 minutes, depends on transcriptional regulation; on the contrary, it most likely relies on  
390 extranuclear-initiated pathways involving ER $\beta$ . Our findings with PaPE-1 and molecular dynamics  
391 as well as the existence of a pool of ER $\beta$  outside the nucleus of mouse  $\beta$ -cells (Alonso-Magdalena  
392 et al., 2008) support this statement. Designed to selectively trigger extranuclear-initiated pathways,  
393 PaPE-1 was obtained after chemical rearrangement of key elements of the original steroid structure  
394 of E2 so that its ER binding affinity was considerably reduced (Madak-Erdogan et al., 2016). These  
395 modifications were performed by substituting the B-ring of the steroid and methylating the  
396 positions 2 and 6 of the A-ring, which prevents the formation of key hydrogen bonds within the  
397 ligand binding domain (Madak-Erdogan et al., 2016). Similar methylations are observed in  
398 tetramethyl BPF (TMBPF), which had no estrogenic effect as assayed by E-SCREEN and it has

399 been proposed as a safer substitute of BPA (Soto et al., 2017). Here, PaPE-1 blocked  $K_{ATP}$  channels  
400 in islet cells from WT but not from BERKO mice, which indicates that PaPE-1 and bisphenols  
401 activate a similar pathway.

402 How can bisphenols trigger a rapid effect at low nanomolar concentrations when their affinity for  
403  $ER\beta$  is within the micromolar range? It is important to bear in mind that the maximum response  
404 to a ligand does not depend exclusively on the receptor affinity. The efficacy of the conformational  
405 change needed to initiate the signaling cascade as well as the coupling to other signaling proteins  
406 also play key roles in the ligand-receptor response (Colquhoun, 1998). Even though the details of  
407 the whole pathway from  $ER\beta$  activation to  $K_{ATP}$  closure is not completely known, it has been  
408 shown that 1 nM E2 closes  $K_{ATP}$  channels through an extranuclear-initiated pathway that involved  
409  $ER\beta$ , membrane guanylate cyclase, cGMP formation and protein kinase G activation (Ropero et  
410 al., 1999; Soriano et al., 2009). The efficacy of this pathway is extremely high as explained below.

411 In addition to the control of the  $\beta$ -cell resting membrane potential,  $K_{ATP}$  channels determine the  
412 electrical resistance of the  $\beta$  cell membrane (Ashcroft, 2005). When  $K_{ATP}$  channels are open, the  
413 electrical resistance is low, whereas the resistance is high when these channels are closed. The  
414 membrane potential follows Ohm's law, being the product of the electrical resistance of the  
415 membrane by the current running across it. This means that, when extracellular glucose is high,  
416  $K_{ATP}$  channels are mostly closed and membrane resistance is high. Hence, a small change in  
417 current will elicit membrane depolarization, potentiation of electrical activity, and insulin secretion  
418 (Ashcroft, 2005). Our results suggest that bisphenol-induced  $K_{ATP}$  channel blockade may lead to  
419 enough change in current that will culminate with increased insulin secretion at high glucose. A  
420 similar phenomenon is observed with the incretin GLP-1, which acts as an effective secretagogue  
421 only when glucose concentrations are stimulatory and a high percentage of  $K_{ATP}$  channels are

422 already closed (Holz et al., 1993). Therefore, low doses of bisphenols will be mainly effective  
423 under conditions of decreased  $K_{ATP}$  channel activity, as seen in the postprandial state. Accordingly,  
424 we show that bisphenols are effective insulin secretagogues only when glucose levels are high.  
425 Besides their acute effects, longer treatment with bisphenols elicited changes in gene expression  
426 and GSIS. As already mentioned, insulin release is a consequence of the electrical activity of  
427 pancreatic  $\beta$ -cells, which is determined by the expression of ion channels as well as their  
428 biophysical characteristics. Both BPS and BPF decreased the expression of *Cacna1e*, *Kcnma1* and  
429 *Scn9a*, which encode essential subunits of  $Ca_v2.3$ ,  $K_{Ca1.1}$ , and  $Na_v1.9$  channels. BPS decreased  
430 the expression of all channel subunits analyzed at 1 nM, while its effect was lower at 100 nM and  
431 1  $\mu$ M, which suggests an NMDR relationship. BPF, however, needed higher doses (at least 100  
432 nM) to change channel subunits expression. Therefore, BPS effects on gene expression were 100-  
433 and 1000-fold stronger than BPF.

434 Changes in ion channel expression by 1nM BPA during 48 hours enhanced GSIS (Villar-Pazos et  
435 al., 2017; Martinez-Pinna et al., 2019). Here, BPS treatment for 48 h increased GSIS at 1 nM and  
436 1  $\mu$ M in the presence of 8.3 mM glucose, but only 1 nM BPS was effective in the presence of 16.7  
437 mM glucose. This was surprising and it may indicate the existence of a BPS-triggered mechanism  
438 that depends on glucose concentration. A similar effect was described for BPA (Villar-Pazos et  
439 al., 2017), in which BPA exposure for 48 h decreased exocytosis at low glucose (5.6 mM) but  
440 increased exocytosis at high glucose concentrations (11 mM). While these findings suggest the  
441 existence of a crosstalk between BPA and glucose signaling effects on the exocytotic machinery,  
442 the existence of such crosstalk is yet to be elucidated. Exposure to BPF enhanced GSIS only at 1  
443  $\mu$ M, the same concentration at which gene expression occurred. These results emphasize the  
444 different potencies observed between BPS and BPF.

445 Our results in BERKO mice indicate that both BPS and BPF effects on gene expression are  
446 mediated by ER $\beta$ . BPF acts within the micromolar range, which is compatible with its ER $\beta$  affinity  
447 (see below). On the other hand, our data also suggest that 1 nM BPS acts through ER $\beta$ , which is  
448 surprising if we consider that BPS binds to ER $\beta$  and activates the classic nuclear-initiated pathway  
449 at higher concentrations. In vitro bioassays using the stably transfected HELN-hER $\beta$  cell line,  
450 which contains a luciferase gene driven by an ERE under the control of hER $\beta$ , have clearly  
451 demonstrated that BPA, BPS and BPF behaved as full hER $\beta$  agonists with potencies in the  
452 following order: BPA>BPF>BPS (Molina-Molina et al., 2013). Additionally, whole-cell  
453 competitive binding assays using the same cell line showed IC<sub>50</sub> values of 0.21±0.01 nM (E2),  
454 401±126 nM (BPA), 1452±261 nM (BPF), and 3452±878 nM (BPS) (Molina-Molina et al., 2013).  
455 Although our findings with BPF are compatible with this classic model, this does not seem to be  
456 the case for BPA and BPS.

457 We pointed out in the first part of the Discussion that low doses of bisphenols can signal through  
458 extranuclear-initiated pathways in  $\beta$ -cells. We showed that, like bisphenols, PaPE-1 is an agonist  
459 that uses this extranuclear pathway to decrease K<sub>ATP</sub> channel activity in an ER $\beta$ -dependent manner.  
460 Then, it is possible that an extranuclear-initiated pathway may be implied in bisphenols action to  
461 explain their effects at nanomolar concentrations.

462 As already discussed, the efficacy of bisphenol response would depend on the interaction between  
463 ER $\beta$  and other proteins involved in extranuclear signaling. Molecular dynamics indicated that  
464 dimerization may be important and may explain, at least in part, why BPA and BPS are more  
465 potent than BPF. Dimerization is a requisite for ER extranuclear signaling (Razandi et al., 2004;  
466 Levin and Hammes, 2016) and its role deserves further research in the case of bisphenols and other  
467 xenoestrogens. Extranuclear signaling by nuclear receptors is a complex phenomenon and there

468 are very few data showing the activation of such extranuclear pathways by endocrine-disrupting  
469 chemicals, including bisphenols (Marino et al., 2012; Vinas and Watson, 2013; Nadal et al., 2018).  
470 ERs acting through this pathway do not directly engage DNA to regulate transcription but induce  
471 non-nuclear signaling cascades that may lead to transcriptional regulation. Extranuclear ERs  
472 interact with a plethora of signaling proteins associated to the plasma membrane or present in the  
473 cytosol, such as G proteins and other receptors and kinases involved in extranuclear-initiated  
474 signaling triggered by estrogens (Levin and Hammes, 2016). These interactions may amplify  
475 bisphenol response via extranuclear ER $\beta$  as it has been shown for adrenergic and cholinergic  
476 receptors, which respond to ultralow concentrations of ligand within the femtomolar range  
477 (Civciristov et al., 2018). Thus, it is necessary to further study bisphenol-activated extranuclear-  
478 initiated ER signaling pathways to better understand the efficacy of the response. This information  
479 is urgently needed to develop improved testing methods for extranuclear-initiated effects as well  
480 as to fully explain how low doses of estrogenic endocrine-disrupting chemicals affect several  
481 biological processes.

482

## 483 CONCLUSIONS

484 Both short- and long-term exposure to BPS and BPF increases glucose-induced insulin release,  
485 which is a risk factor for T2D. A rapid response may be due to the closure of K<sub>ATP</sub> channels, while  
486 a long-term response seems to be via regulation of ion channel gene expression. As K<sub>ATP</sub> channel  
487 activity, gene expression of ion channel and insulin release are endpoints relatively easy to be  
488 measured, we propose they should be considered key events to assess the potential hazards of  
489 bisphenols.

490 In line with previous work with ER $\beta$  agonists and BPA, our findings with BERKO mice and PaPE-  
491 1 suggest that bisphenols act as ER $\beta$  agonists and activate an extranuclear-initiated pathway.  
492 ER $\beta$  affinity for BPA and BPS cannot easily explain the biological effects described in the present  
493 work and in previous reports. Our data with acute exposure indicate that efficacy may be more  
494 important than affinity to explain effects at low doses. More experimental data on dimerization  
495 and interaction of ER $\beta$  with other signaling molecules in its vicinity are needed to fully understand  
496 effects at low doses of bisphenols, especially on gene transcription. In any case, our data support  
497 that these bisphenols are not a safe alternative to BPA.

498

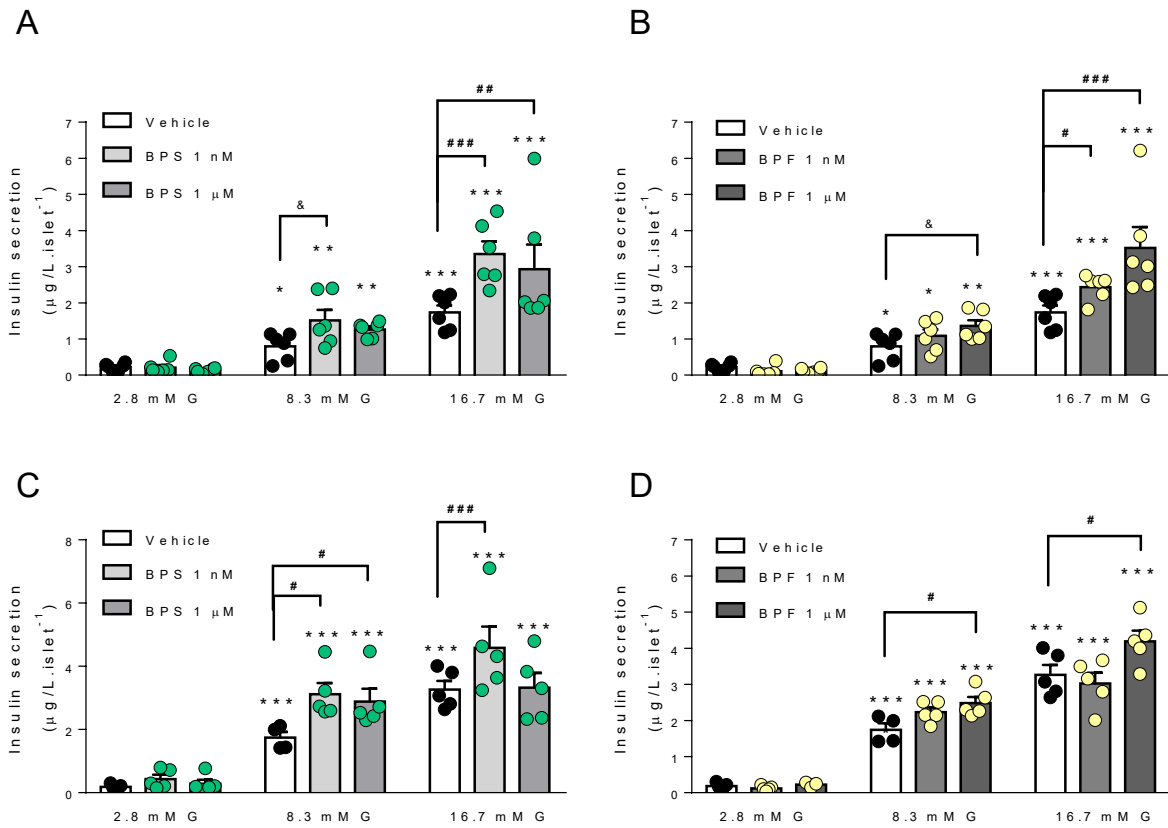

499

500

501 **Figure 1. BPS and BPF increase glucose-stimulated insulin secretion in mouse islets. (A-D)**

502 Insulin secretion was measured at 2.8, 8.3 and 16.7 mM glucose in islets from C57BL/6J mice  
 503 treated *ex vivo* with vehicle (control; black circles and white bars), 1 nM BPS (green circles and  
 504 light grey bars) or BPF (yellow circles and light grey bars), or 1 μM BPS (green circles and dark  
 505 grey bars) or BPF (yellow circles and dark grey bars). **(A and B)** After 2 h of recovery, treatments  
 506 (vehicle, BPS or BPF) were added to each glucose solution so that the islets remained under  
 507 treatment during the whole experiment. **(C and D)** Islets were treated *ex vivo* with vehicle BPS or  
 508 BPF for 48 h, and then, glucose-stimulated insulin secretion was performed in the absence of  
 509 treatments. Insulin release was measured by ELISA. Data are shown as means ± SEM of six  
 510 independent islet preparations isolated on three different days: \* $p \leq 0.05$ , \*\* $p \leq 0.01$ , \*\*\* $p \leq 0.001$  vs  
 511 2.8 mM; # $p \leq 0.05$ , ## $p \leq 0.01$ , ### $p \leq 0.001$  comparisons indicated by bars (one-way ANOVA);  
 512 & $p \leq 0.05$  (Student's t-test).

513



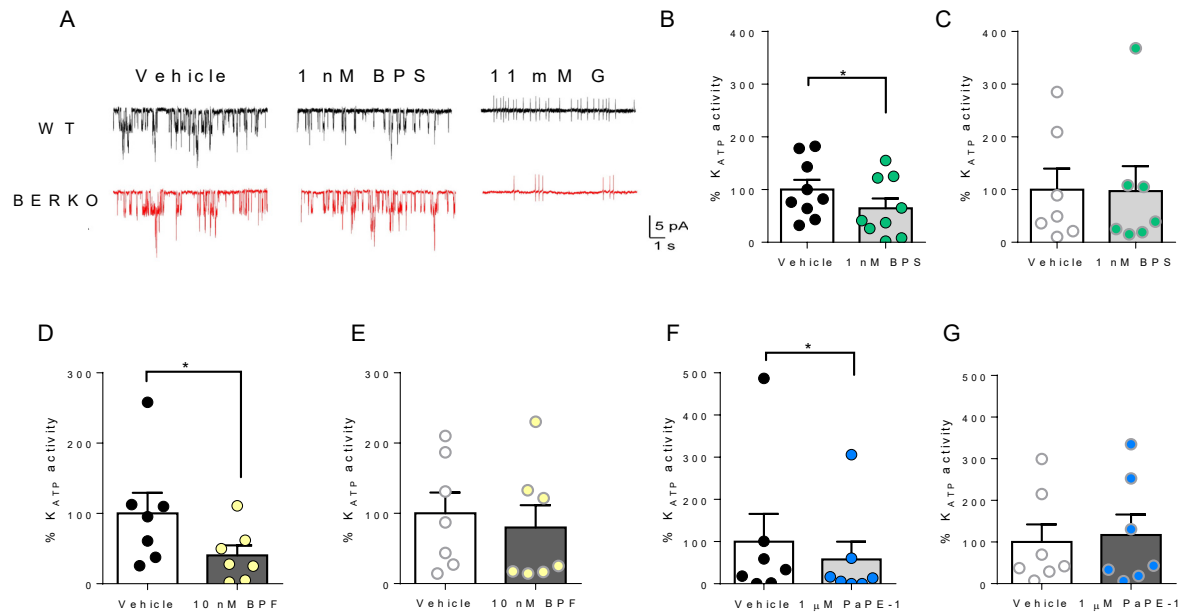

514  
 515 **Figure 2. BPS, BPF and PaPE-1 block  $K_{ATP}$  channel activity in mouse pancreatic  $\beta$ -cells.** (A)  
 516 Representative recordings of  $K_{ATP}$  channel activity in  $\beta$ -cells isolated from wild-type (WT) (black  
 517 traces) or BERKO (red traces) mice in control condition (0 mM glucose; vehicle; left column), in  
 518 1 nM BPS (middle column) and in 11 mM glucose (right). Channel openings are represented by  
 519 downward deflections, reflecting inward currents due to the high  $K^+$  content of the pipette. The  
 520 abolition of  $K_{ATP}$  activity and generation of action currents at 11 mM glucose was used as a positive  
 521 control of pancreatic  $\beta$ -cell identity (right column). (B-G) Quantification of the  $K_{ATP}$  channel  
 522 activity in  $\beta$ -cells isolated from wild-type (WT) (B, D and F) or BERKO (C, E and G) mice  
 523 treated *in vitro* with vehicle (black or white circles and white bars), 1 nM BPS (B and C; green  
 524 circles and light grey bars), 10 nM BPF (D and E; yellow circles and dark grey bars) or 1  $\mu$ M  
 525 PaPE-1 (F and G; blue circles and black bars). The effect of three bisphenols was measured after  
 526  $7 \pm 1$  min of acute application. Data are represented as a percentage of activity with respect to  
 527 resting conditions (0 mM Glucose). Experiments were carried out at  $32-34^\circ\text{C}$ . Data are shown as  
 528 means  $\pm$  SEM of the number of cells recorded in WT ( $n=7-9$  cells) and BERKO ( $n=7-9$  cells) mice.  
 529 These cells were isolated from three mice on three different days. \* $p \leq 0.05$  vs control (Student's  
 530 paired t-test).

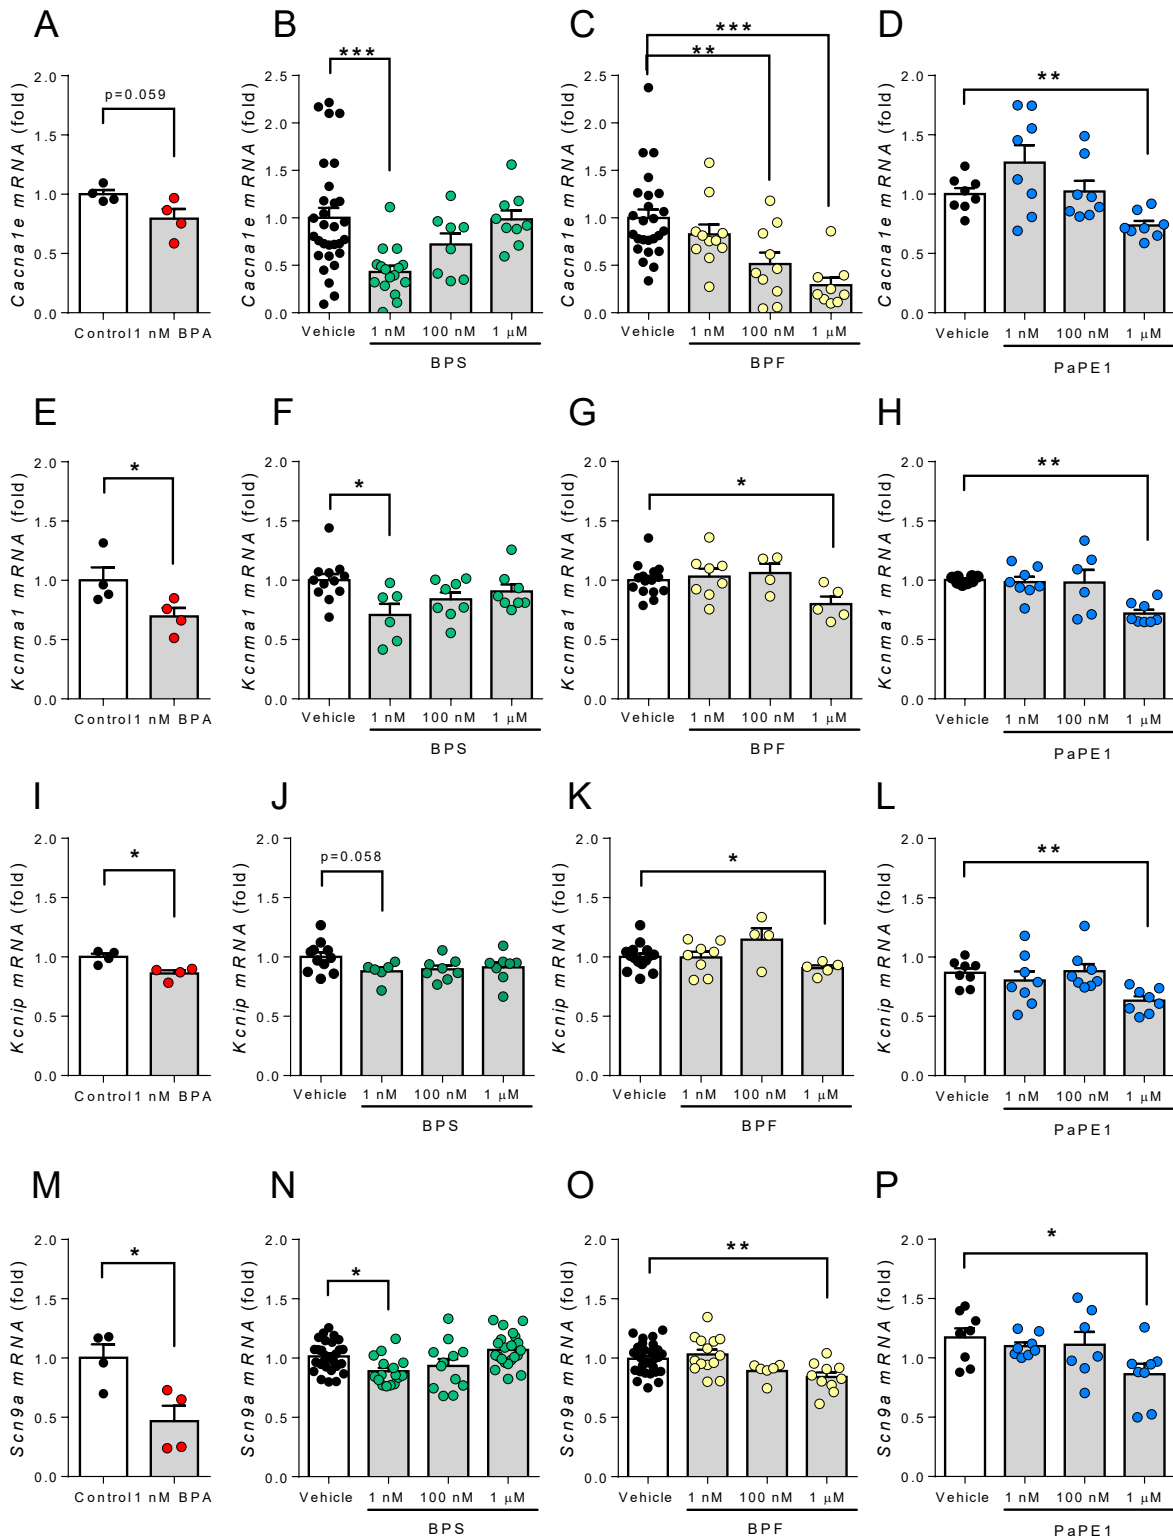

531

532 **Figure 3. BPA, BPS, BPF and PaPE-1 reduce *Cacna1e*, *Kcnma1*, *Kcnip* and *Scn9a* expression**  
 533 **in mouse islets. mRNA expression of *Cacna1e* (A-D), *Kcnma1* (E-H), *Kcnip* (I-L) and *Scn9a* (M-P)**

534 was measured in islets from C57BL/6J mice treated *ex vivo* with vehicle (control; black circles and  
535 white bars), BPA (**A, E, I and M**; red circles and light grey bars), BPS (**B, F, J and N**; green  
536 circles and light grey bars), or BPF (**C, G, K and O**; yellow circles and light grey bars) or PaPE-  
537 1 (**D, H, L and P**; blue circles and light grey bars) at 1, 100 and 1000 nM for 48 h. mRNA  
538 expression was measured by qRT-PCR and normalized to the housekeeping gene *Hprt1*, and is  
539 shown as fold vs. mean of the controls. Data are shown as means  $\pm$  SEM of four to twenty-nine  
540 independent samples from up to twenty-nine islets preparations isolated on at least three different  
541 days: \* $p \leq 0.05$ , \*\* $p \leq 0.01$ , \*\*\* $p \leq 0.001$  (ANOVA one way).

542

543

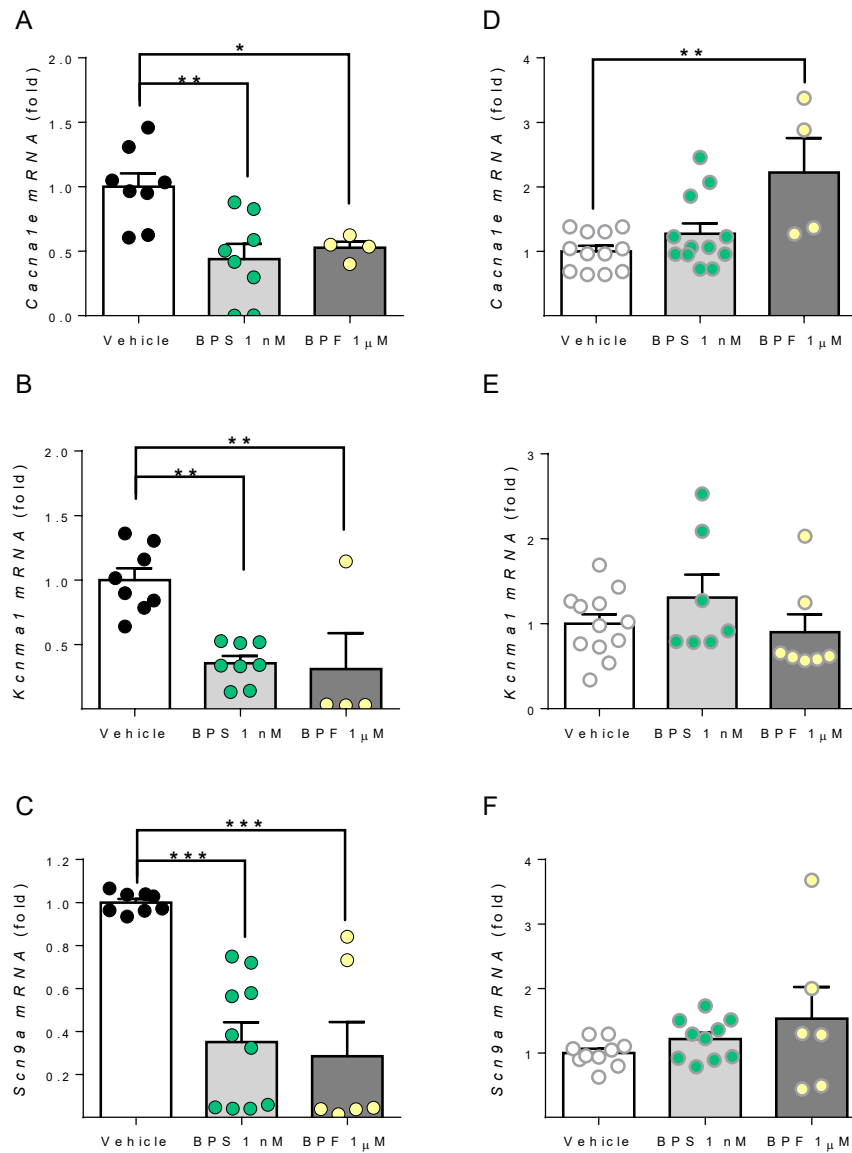

544

545 **Figure 4. BPS, and BPF, reduce *Cacna1e*, *Kcnma1* and *Scn9a* expression in islets from wild**  
 546 **type but not from BERKO mice.** mRNA expression of *Cacna1e* (A and D), *Kcnma1* (B and E)  
 547 and *Scn9a* (C and F) in islets isolated from wild-type (A, B and C) or BERKO (D, E and F) mice  
 548 treated *ex vivo* with vehicle (control; black circles and white bars), 1 nM BPS (green circles and  
 549 light grey bars), or 1 μM BPF (yellow circles and dark grey bars) for 48 h. mRNA expression was  
 550 measured by qRT-PCR and normalized to the housekeeping gene *Hprt1*, and is shown as fold vs  
 551 mean of the controls. Data are shown as means ± SEM of four to eight independent islet  
 552 preparations isolated on at least three different days: \*p ≤ 0.05, \*\*p ≤ 0.01, \*\*\*p ≤ 0.001 (ANOVA  
 553 one way).

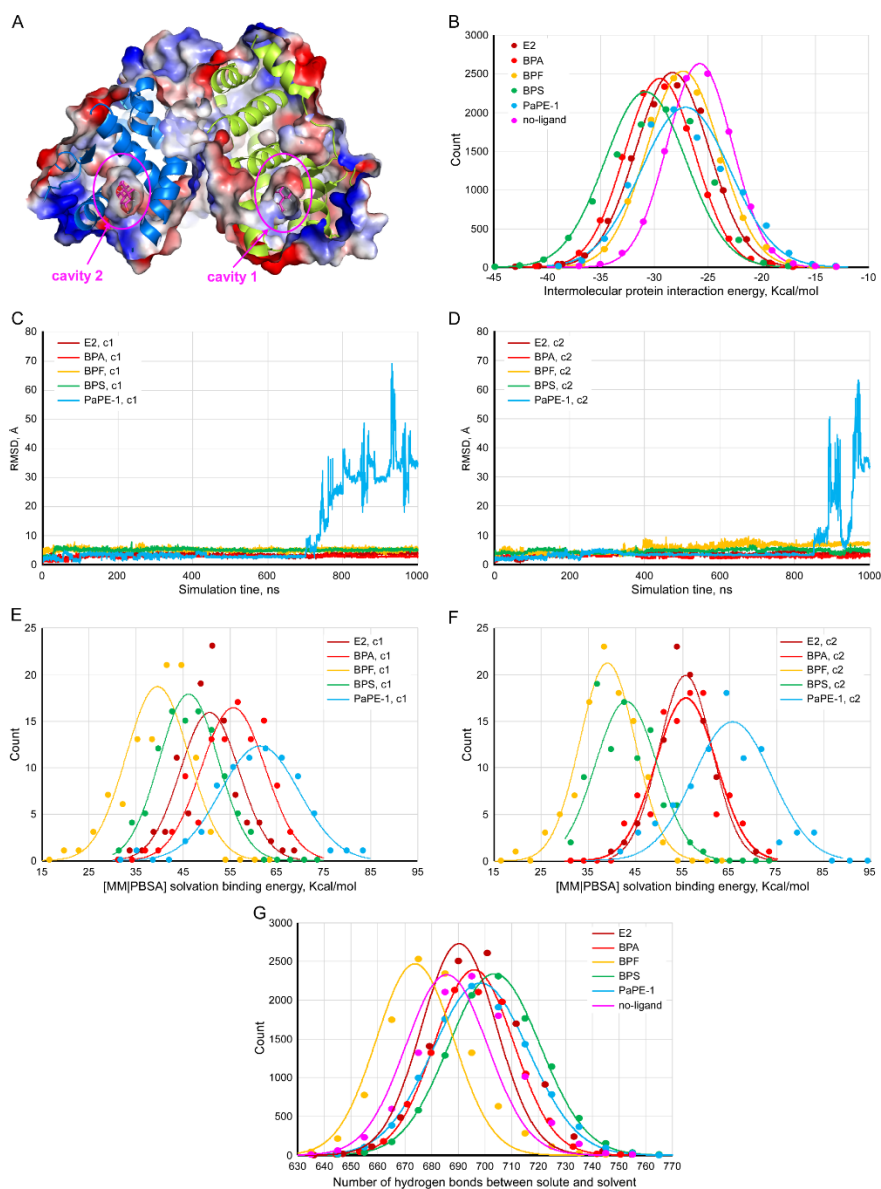

554

555 **Figure 5. Molecular Dynamics.** Analysis of trajectories, MM/PBSA solvation binding energies,  
 556 and intermolecular interaction energies for the rER $\beta$ - $\Delta$ H12-LBD dimer from the data generated by  
 557 MD simulations for 1  $\mu$ s. (A) rER $\beta$ - $\Delta$ H12-LBD dimer secondary structure and electrostatic  
 558 surface. The LBD cavity has been cut to show a bound ligand inside the structure. In the following  
 559 panels, *c1* refers to cavity 1 and *c2* refers to cavity 2. (B) Frequency distributions of the  
 560 intermolecular protein interaction energy for the subunits of the rER $\beta$ - $\Delta$ H12-LBD dimer in the  
 561 presence of different ligands in each LBD cavity. (C and D) trajectories of the ligands (RMSD,  
 562 Å) initially docked in cavity 1 (C) and 2 (D) of the LBD. (E and F) Frequency distributions of the  
 563 MM/PBSA solvation binding energy values of each ligand attached to cavity 1 (E) and 2 (F). (G)  
 564 Frequency distribution of the number of H-bonds between the solute (protein) and the solvent. A  
 565 Gaussian curve overlaps discrete data. The legends included within each panel indicate the  
 566 different ligands analyzed.

567

568 AUTHOR INFORMATION

569 **Corresponding Author**

570 \* Angel Nadal, Instituto de Investigación, Desarrollo e Innovación en Biotecnología Sanitaria de  
571 Elche (IDiBE), Universitas Miguel Hernández, 03202, Elche, Spain.

572 E-mail: [nadal@umh.es](mailto:nadal@umh.es)

573 **Author Contributions**

574 **LM:** Conceptualization, Supervision, Investigation, Formal Analysis, Visualization, Writing -  
575 Review & Editing **JMP:** Conceptualization, Investigation, Formal Analysis, Visualization,  
576 Writing - Review & Editing **MCM:** Investigation, Formal Analysis, Visualization, Writing -  
577 Review & Editing **RSdS:** Investigation, Formal Analysis, Writing - Review & Editing **RMMG:**  
578 Investigation, Formal Analysis, Writing - Review & Editing **SS:** Investigation, Formal Analysis,  
579 Visualization, Writing - Review & Editing **IQ:** Visualization, Resources, Funding Acquisition,  
580 Writing - Review & Editing **J-AG:** Resources, Writing - Review & Editing **JAE:**  
581 Conceptualization, Investigation, Visualization, Resources, Funding Acquisition, Writing -  
582 Review & Editing **AN:** Conceptualization, Supervision, Visualization, Resources, Funding  
583 Acquisition, Writing - Original Draft, Project Administration. All authors have given approval to  
584 the final version of the manuscript.

585 **Funding Sources**

586 This work was supported by BPU2017-86579-R (AN) and BFU2016-77125-R (IQ) and RTI2018-  
587 096724-B-C21 (JAE) supported by FEDER/Ministerio de Ciencia e Innovación-Agencia Estatal  
588 de Investigación. PROMETEO/2020/006 (AN), PROMETEO/2016/006 (JAE) and SEJI/2018/023

589 (LM) supported by Generalitat Valenciana. J-AG was supported by the Robert A. Welch  
590 Foundation (E-0004). CIBERDEM is an initiative of the Instituto de Salud Carlos III.

591

## 592 ACKNOWLEDGMENT

593 The authors thank Maria Luisa Navarro, Salomé Ramon, and Beatriz Bonmati Botella for their  
594 excellent technical assistance. We are grateful to the Cluster of Scientific Computing  
595 (<http://ccc.umh.es/>) of the Universitas Miguel Hernández for providing computing facilities.

596

## 597 REFERENCES

- 598 Acconcia, F., Pallottini, V., Marino, M., 2015. Molecular Mechanisms of Action of BPA. Dose  
599 Response 13, 1559325815610582.
- 600 Alonso-Magdalena, P., Morimoto, S., Ripoll, C., Fuentes, E., Nadal, A., 2006. The estrogenic  
601 effect of bisphenol A disrupts pancreatic beta-cell function in vivo and induces insulin resistance.  
602 Environ Health Perspect 114, 106-112.
- 603 Alonso-Magdalena, P., Quesada, I., Nadal, A., 2011. Endocrine disruptors in the etiology of type  
604 2 diabetes mellitus. Nat Rev Endocrinol 7, 346-353.
- 605 Alonso-Magdalena, P., Ropero, A.B., Carrera, M.P., Cederroth, C.R., Baquie, M., Gauthier, B.R.,  
606 Nef, S., Stefani, E., Nadal, A., 2008. Pancreatic insulin content regulation by the estrogen receptor  
607 ER alpha. PLoS One 3, e2069.
- 608 American Diabetes, A., 2018. 2. Classification and Diagnosis of Diabetes: Standards of Medical  
609 Care in Diabetes-2018. Diabetes Care 41, S13-S27.
- 610 Ascenzi, P., Bocedi, A., Marino, M., 2006. Structure-function relationship of estrogen receptor  
611 alpha and beta: impact on human health. Mol Aspects Med 27, 299-402.
- 612 Ashcroft, F.M., 2005. ATP-sensitive potassium channelopathies: focus on insulin secretion. J Clin  
613 Invest 115, 2047-2058.
- 614 Batista, T.M., Alonso-Magdalena, P., Vieira, E., Amaral, M.E., Cederroth, C.R., Nef, S., Quesada,  
615 I., Carneiro, E.M., Nadal, A., 2012. Short-term treatment with bisphenol-A leads to metabolic  
616 abnormalities in adult male mice. PLoS One 7, e33814.
- 617 Beausoleil, C., Emond, C., Cravedi, J.P., Antignac, J.P., Applanat, M., Appenzeller, B.R.,  
618 Beaudouin, R., Belzunces, L.P., Canivenc-Lavier, M.C., Chevalier, N., Chevrier, C., Elefant, E.,  
619 Eustache, F., Habert, R., Kolf-Clauw, M., Le Magueresse-Battistoni, B., Mhaouty-Kodja, S.,  
620 Minier, C., Multigner, L., Schroeder, H., Thonneau, P., Viguie, C., Pouzaud, F., Ormsby, J.N.,  
621 Rousselle, C., Verines-Jouin, L., Pasquier, E., Michel, C., 2018. Regulatory identification of BPA  
622 as an endocrine disruptor: Context and methodology. Mol Cell Endocrinol 475, 4-9.

- 623 Beydoun, H.A., Khanal, S., Zonderman, A.B., Beydoun, M.A., 2014. Sex differences in the  
624 association of urinary bisphenol-A concentration with selected indices of glucose homeostasis  
625 among U.S. adults. *Ann Epidemiol* 24, 90-97.
- 626 Biasini, M., Bienert, S., Waterhouse, A., Arnold, K., Studer, G., Schmidt, T., Kiefer, F., Gallo  
627 Cassarino, T., Bertoni, M., Bordoli, L., Schwede, T., 2014. SWISS-MODEL: modelling protein  
628 tertiary and quaternary structure using evolutionary information. *Nucleic Acids Res* 42, W252-  
629 258.
- 630 Boronat-Belda, T., Ferrero, H., Al-Abdulla, R., Quesada, I., Gustafsson, J.A., Nadal, A., Alonso-  
631 Magdalena, P., 2020. BISPENOL-A EXPOSURE DURING PREGNANCY ALTERS  
632 PANCREATIC beta-CELL DIVISION AND MASS IN MALE MICE OFFSPRING: A ROLE  
633 FOR ERbeta. *Food Chem Toxicol*, 111681.
- 634 Celik, L., Lund, J.D., Schiott, B., 2007. Conformational dynamics of the estrogen receptor alpha:  
635 molecular dynamics simulations of the influence of binding site structure on protein dynamics.  
636 *Biochemistry* 46, 1743-1758.
- 637 Chen, L., Chen, J., Zhou, G., Wang, Y., Xu, C., Wang, X., 2016. Molecular Dynamics Simulations  
638 of the Permeation of Bisphenol A and Pore Formation in a Lipid Membrane. *Sci Rep* 6, 33399.
- 639 Civecristov, S., Ellisdon, A.M., Suderman, R., Pon, C.K., Evans, B.A., Kleifeld, O., Charlton, S.J.,  
640 Hlavacek, W.S., Canals, M., Halls, M.L., 2018. Preassembled GPCR signaling complexes mediate  
641 distinct cellular responses to ultralow ligand concentrations. *Sci Signal* 11.
- 642 Colquhoun, D., 1998. Binding, gating, affinity and efficacy: the interpretation of structure-activity  
643 relationships for agonists and of the effects of mutating receptors. *Br J Pharmacol* 125, 924-947.
- 644 Corkey, B.E., 2012. Banting lecture 2011: hyperinsulinemia: cause or consequence? *Diabetes* 61,  
645 4-13.
- 646 Delfosse, V., Grimaldi, M., Pons, J.L., Boulahtouf, A., le Maire, A., Cavailles, V., Labesse, G.,  
647 Bourguet, W., Balaguer, P., 2012. Structural and mechanistic insights into bisphenols action  
648 provide guidelines for risk assessment and discovery of bisphenol A substitutes. *Proc Natl Acad*  
649 *Sci U S A* 109, 14930-14935.
- 650 Delgado, J., Radusky, L.G., Cianferoni, D., Serrano, L., 2019. FoldX 5.0: working with RNA,  
651 small molecules and a new graphical interface. *Bioinformatics* 35, 4168-4169.
- 652 Duan, Y., Yao, Y., Wang, B., Han, L., Wang, L., Sun, H., Chen, L., 2018. Association of urinary  
653 concentrations of bisphenols with type 2 diabetes mellitus: A case-control study. *Environ Pollut*  
654 243, 1719-1726.
- 655 Encinar, J.A., Fernandez-Ballester, G., Galiano-Ibarra, V., Micol, V., 2015. In silico approach for  
656 the discovery of new PPARgamma modulators among plant-derived polyphenols. *Drug Des Devel*  
657 *Ther* 9, 5877-5895.
- 658 Erion, K.A., Corkey, B.E., 2017. Hyperinsulinemia: a Cause of Obesity? *Curr Obes Rep* 6, 178-  
659 186.
- 660 Ferguson, M., Lorenzen-Schmidt, I., Pyle, W.G., 2019. Bisphenol S rapidly depresses heart  
661 function through estrogen receptor-beta and decreases phospholamban phosphorylation in a sex-  
662 dependent manner. *Sci Rep* 9, 15948.
- 663 Fratev, F., 2015. Activation helix orientation of the estrogen receptor is mediated by receptor  
664 dimerization: evidence from molecular dynamics simulations. *Phys Chem Chem Phys* 17, 13403-  
665 13420.
- 666 Galiano, V., Garcia-Valtanen, P., Micol, V., Encinar, J.A., 2016. Looking for inhibitors of the  
667 dengue virus NS5 RNA-dependent RNA-polymerase using a molecular docking approach. *Drug*  
668 *Des Devel Ther* 10, 3163-3181.



669 Gao, X., Ma, J., Chen, Y., Wang, H.S., 2015. Rapid responses and mechanism of action for low-  
670 dose bisphenol S on ex vivo rat hearts and isolated myocytes: evidence of female-specific  
671 proarrhythmic effects. *Environ Health Perspect* 123, 571-578.

672 Gore, A.C., Chappell, V.A., Fenton, S.E., Flaws, J.A., Nadal, A., Prins, G.S., Toppari, J., Zoeller,  
673 R.T., 2015. EDC-2: The Endocrine Society's Second Scientific Statement on Endocrine-Disrupting  
674 Chemicals. *Endocr Rev* 36, E1-E150.

675 Hagobian, T.A., Bird, A., Stanelle, S., Williams, D., Schaffner, A., Phelan, S., 2019. Pilot Study  
676 on the Effect of Orally Administered Bisphenol A on Glucose and Insulin Response in Nonobese  
677 Adults. *J Endocr Soc* 3, 643-654.

678 Heldring, N., Pike, A., Andersson, S., Matthews, J., Cheng, G., Hartman, J., Tujague, M., Strom,  
679 A., Treuter, E., Warner, M., Gustafsson, J.A., 2007. Estrogen receptors: how do they signal and  
680 what are their targets. *Physiol Rev* 87, 905-931.

681 Hiriart, M., Velasco, M., Larque, C., Diaz-Garcia, C.M., 2014. Metabolic syndrome and ionic  
682 channels in pancreatic beta cells. *Vitam Horm* 95, 87-114.

683 Holz, G.G.t., Kuhlreiber, W.M., Habener, J.F., 1993. Pancreatic beta-cells are rendered glucose-  
684 competent by the insulinotropic hormone glucagon-like peptide-1(7-37). *Nature* 361, 362-365.

685 Jacobson, D.A., Shyng, S.L., 2020. Ion Channels of the Islets in Type 2 Diabetes. *J Mol Biol* 432,  
686 1326-1346.

687 Jacobson, M.H., Woodward, M., Bao, W., Liu, B., Trasande, L., 2019. Urinary Bisphenols and  
688 Obesity Prevalence Among U.S. Children and Adolescents. *J Endocr Soc* 3, 1715-1726.

689 Jereva, D., Fratev, F., Tsakovska, I., Alov, P., Pencheva, T., Pajeva, I., 2017. Molecular dynamics  
690 simulation of the human estrogen receptor alpha: contribution to the pharmacophore of the  
691 agonists. *Mathematics and Computers in Simulation* 133, 124-134.

692 Keminer, O., Teigeler, M., Kohler, M., Wenzel, A., Arning, J., Kassner, F., Windshugel, B.,  
693 Eilebrecht, E., 2019. A tiered high-throughput screening approach for evaluation of estrogen and  
694 androgen receptor modulation by environmentally relevant bisphenol A substitutes. *Sci Total*  
695 *Environ*, 134743.

696 Kolla, S., Morcos, M., Martin, B., Vandenberg, L.N., 2018. Low dose bisphenol S or ethinyl  
697 estradiol exposures during the perinatal period alter female mouse mammary gland development.  
698 *Reprod Toxicol* 78, 50-59.

699 Kregel, J.H., Hodgins, J.B., Couse, J.F., Enmark, E., Warner, M., Mahler, J.F., Sar, M., Korach,  
700 K.S., Gustafsson, J.A., Smithies, O., 1998. Generation and reproductive phenotypes of mice  
701 lacking estrogen receptor beta. *Proc Natl Acad Sci U S A* 95, 15677-15682.

702 Lang, I.A., Galloway, T.S., Scarlett, A., Henley, W.E., Depledge, M., Wallace, R.B., Melzer, D.,  
703 2008. Association of urinary bisphenol A concentration with medical disorders and laboratory  
704 abnormalities in adults. *JAMA* 300, 1303-1310.

705 Le Magueresse-Battistoni, B., Multigner, L., Beausoleil, C., Rousselle, C., 2018. Effects of  
706 bisphenol A on metabolism and evidences of a mode of action mediated through endocrine  
707 disruption. *Mol Cell Endocrinol* 475, 74-91.

708 Levin, E.R., Hammes, S.R., 2016. Nuclear receptors outside the nucleus: extranuclear signalling  
709 by steroid receptors. *Nat Rev Mol Cell Biol* 17, 783-797.

710 Li, Y., Perera, L., Coons, L.A., Burns, K.A., Tyler Ramsey, J., Pelch, K.E., Houtman, R., van  
711 Beuningen, R., Teng, C.T., Korach, K.S., 2018. Differential in Vitro Biological Action,  
712 Coregulator Interactions, and Molecular Dynamic Analysis of Bisphenol A (BPA), BPAF, and  
713 BPS Ligand-ERalpha Complexes. *Environ Health Perspect* 126, 017012.

- 714 Liao, C., Liu, F., Alomirah, H., Loi, V.D., Mohd, M.A., Moon, H.B., Nakata, H., Kannan, K.,  
715 2012a. Bisphenol S in urine from the United States and seven Asian countries: occurrence and  
716 human exposures. *Environ Sci Technol* 46, 6860-6866.
- 717 Liao, C., Liu, F., Guo, Y., Moon, H.B., Nakata, H., Wu, Q., Kannan, K., 2012b. Occurrence of  
718 eight bisphenol analogues in indoor dust from the United States and several Asian countries:  
719 implications for human exposure. *Environ Sci Technol* 46, 9138-9145.
- 720 Liu, B., Lehmler, H.J., Sun, Y., Xu, G., Sun, Q., Snetselaar, L.G., Wallace, R.B., Bao, W., 2019.  
721 Association of Bisphenol A and Its Substitutes, Bisphenol F and Bisphenol S, with Obesity in  
722 United States Children and Adolescents. *Diabetes Metab J* 43, 59-75.
- 723 Madak-Erdogan, Z., Kim, S.H., Gong, P., Zhao, Y.C., Zhang, H., Chambliss, K.L., Carlson, K.E.,  
724 Mayne, C.G., Shaul, P.W., Korach, K.S., Katzenellenbogen, J.A., Katzenellenbogen, B.S., 2016.  
725 Design of pathway preferential estrogens that provide beneficial metabolic and vascular effects  
726 without stimulating reproductive tissues. *Sci Signal* 9, ra53.
- 727 Malaise, Y., Lencina, C., Cartier, C., Olier, M., Menard, S., Guzylack-Piriou, L., 2020. Perinatal  
728 oral exposure to low doses of bisphenol A, S or F impairs immune functions at intestinal and  
729 systemic levels in female offspring mice. *Environ Health* 19, 93.
- 730 Marino, M., Pellegrini, M., La Rosa, P., Acconcia, F., 2012. Susceptibility of estrogen receptor  
731 rapid responses to xenoestrogens: Physiological outcomes. *Steroids* 77, 910-917.
- 732 Martinez-Pinna, J., Marroqui, L., Hmadcha, A., Lopez-Beas, J., Soriano, S., Villar-Pazos, S.,  
733 Alonso-Magdalena, P., Dos Santos, R.S., Quesada, I., Martin, F., Soria, B., Gustafsson, J.A.,  
734 Nadal, A., 2019. Oestrogen receptor beta mediates the actions of bisphenol-A on ion channel  
735 expression in mouse pancreatic beta cells. *Diabetologia* 62, 1667-1680.
- 736 Molina-Molina, J.M., Amaya, E., Grimaldi, M., Saenz, J.M., Real, M., Fernandez, M.F., Balaguer,  
737 P., Olea, N., 2013. In vitro study on the agonistic and antagonistic activities of bisphenol-S and  
738 other bisphenol-A congeners and derivatives via nuclear receptors. *Toxicol Appl Pharmacol* 272,  
739 127-136.
- 740 Mustieles, V., D'Cruz, S.C., Couderq, S., Rodriguez-Carrillo, A., Fini, J.B., Hofer, T., Steffensen,  
741 I.L., Dirven, H., Barouki, R., Olea, N., Fernandez, M.F., David, A., 2020. Bisphenol A and its  
742 analogues: A comprehensive review to identify and prioritize effect biomarkers for human  
743 biomonitoring. *Environ Int* 144, 105811.
- 744 Nadal, A., Alonso-Magdalena, P., Soriano, S., Quesada, I., Roperro, A.B., 2009. The pancreatic  
745 beta-cell as a target of estrogens and xenoestrogens: Implications for blood glucose homeostasis  
746 and diabetes. *Mol Cell Endocrinol* 304, 63-68.
- 747 Nadal, A., Fuentes, E., Ripoll, C., Villar-Pazos, S., Castellano-Munoz, M., Soriano, S., Martinez-  
748 Pinna, J., Quesada, I., Alonso-Magdalena, P., 2018. Extranuclear-initiated estrogenic actions of  
749 endocrine disrupting chemicals: Is there toxicology beyond paracelsus? *J Steroid Biochem Mol*  
750 *Biol* 176, 16-22.
- 751 Nadal, A., Soria, B., 1997. Glucose metabolism regulates cytosolic Ca<sup>2+</sup> in the pancreatic beta-  
752 cell by three different mechanisms. *Adv Exp Med Biol* 426, 235-243.
- 753 Pike, A.C.W., Brzozowski, A.M., Walton, J., Hubbard, R.E., Thorsell, A.-G., Li, Y.-L.,  
754 Gustafsson, J.-Å., Carlquist, M., 2001. Structural Insights into the Mode of Action of a Pure  
755 Antiestrogen. *Structure* 9, 145-153.
- 756 Quesada, I., Fuentes, E., Viso-Leon, M.C., Soria, B., Ripoll, C., Nadal, A., 2002. Low doses of the  
757 endocrine disruptor bisphenol-A and the native hormone 17beta-estradiol rapidly activate  
758 transcription factor CREB. *FASEB J* 16, 1671-1673.

- 759 Ranciere, F., Botton, J., Slama, R., Lacroix, M.Z., Debrauwer, L., Charles, M.A., Roussel, R.,  
760 Balkau, B., Magliano, D.J., Group, D.E.S.I.R.S., 2019. Exposure to Bisphenol A and Bisphenol S  
761 and Incident Type 2 Diabetes: A Case-Cohort Study in the French Cohort D.E.S.I.R. *Environ*  
762 *Health Perspect* 127, 107013.
- 763 Razandi, M., Pedram, A., Merchenthaler, I., Greene, G.L., Levin, E.R., 2004. Plasma membrane  
764 estrogen receptors exist and functions as dimers. *Mol Endocrinol* 18, 2854-2865.
- 765 Rochester, J.R., Bolden, A.L., 2015. Bisphenol S and F: A Systematic Review and Comparison of  
766 the Hormonal Activity of Bisphenol A Substitutes. *Environ Health Perspect* 123, 643-650.
- 767 Ropero, A.B., Alonso-Magdalena, P., Garcia-Garcia, E., Ripoll, C., Fuentes, E., Nadal, A., 2008.  
768 Bisphenol-A disruption of the endocrine pancreas and blood glucose homeostasis. *Int J Androl* 31,  
769 194-200.
- 770 Ropero, A.B., Fuentes, E., Rovira, J.M., Ripoll, C., Soria, B., Nadal, A., 1999. Non-genomic  
771 actions of 17beta-oestradiol in mouse pancreatic beta-cells are mediated by a cGMP-dependent  
772 protein kinase. *J Physiol* 521 Pt 2, 397-407.
- 773 Rorsman, P., Ashcroft, F.M., 2018. Pancreatic beta-Cell Electrical Activity and Insulin Secretion:  
774 Of Mice and Men. *Physiol Rev* 98, 117-214.
- 775 Ruiz-Torres, V., Losada-Echeberria, M., Herranz-Lopez, M., Barrajon-Catalan, E., Galiano, V.,  
776 Micol, V., Encinar, J.A., 2018. New Mammalian Target of Rapamycin (mTOR) Modulators  
777 Derived from Natural Product Databases and Marine Extracts by Using Molecular Docking  
778 Techniques. *Mar Drugs* 16.
- 779 Salentin, S., Schreiber, S., Haupt, V.J., Adasme, M.F., Schroeder, M., 2015. PLIP: fully automated  
780 protein-ligand interaction profiler. *Nucleic Acids Res* 43, W443-447.
- 781 Santin, I., Dos Santos, R.S., Eizirik, D.L., 2016. Pancreatic Beta Cell Survival and Signaling  
782 Pathways: Effects of Type 1 Diabetes-Associated Genetic Variants. *Methods Mol Biol* 1433, 21-  
783 54.
- 784 Shankar, A., Teppala, S., 2011. Relationship between urinary bisphenol A levels and diabetes  
785 mellitus. *J Clin Endocrinol Metab* 96, 3822-3826.
- 786 Shtaiwi, A., Adnan, R., Khairuddean, M., Al-Qattan, M., 2018. Molecular dynamics simulation of  
787 human estrogen receptor free and bound to morpholine ether benzophenone inhibitor. *Theor.*  
788 *Chem. Acc.* 137, 10.
- 789 Smith, C.L., O'Malley, B.W., 2004. Coregulator function: a key to understanding tissue specificity  
790 of selective receptor modulators. *Endocr Rev* 25, 45-71.
- 791 Soriano, S., Alonso-Magdalena, P., Garcia-Arevalo, M., Novials, A., Muhammed, S.J., Salehi, A.,  
792 Gustafsson, J.A., Quesada, I., Nadal, A., 2012. Rapid insulinotropic action of low doses of  
793 bisphenol-A on mouse and human islets of Langerhans: role of estrogen receptor beta. *PLoS One*  
794 7, e31109.
- 795 Soriano, S., Ropero, A.B., Alonso-Magdalena, P., Ripoll, C., Quesada, I., Gassner, B., Kuhn, M.,  
796 Gustafsson, J.A., Nadal, A., 2009. Rapid regulation of K(ATP) channel activity by 17{beta}-  
797 estradiol in pancreatic {beta}-cells involves the estrogen receptor {beta} and the atrial natriuretic  
798 peptide receptor. *Mol Endocrinol* 23, 1973-1982.
- 799 Soto, A.M., Schaeberle, C., Maier, M.S., Sonnenschein, C., Maffini, M.V., 2017. Evidence of  
800 Absence: Estrogenicity Assessment of a New Food-Contact Coating and the Bisphenol Used in Its  
801 Synthesis. *Environ Sci Technol* 51, 1718-1726.
- 802 Stahlhut, R.W., Myers, J.P., Taylor, J.A., Nadal, A., Dyer, J.A., Vom Saal, F.S., 2018.  
803 Experimental BPA Exposure and Glucose-Stimulated Insulin Response in Adult Men and Women.  
804 *J Endocr Soc* 2, 1173-1187.

805 Valdeolmillos, M., Nadal, A., Contreras, D., Soria, B., 1992. The relationship between glucose-  
806 induced K<sup>+</sup>ATP channel closure and the rise in [Ca<sup>2+</sup>]<sub>i</sub> in single mouse pancreatic beta-cells. *J*  
807 *Physiol* 455, 173-186.  
808 Vettorazzi, J.F., Ribeiro, R.A., Borck, P.C., Branco, R.C., Soriano, S., Merino, B., Boschero, A.C.,  
809 Nadal, A., Quesada, I., Carneiro, E.M., 2016. The bile acid TUDCA increases glucose-induced  
810 insulin secretion via the cAMP/PKA pathway in pancreatic beta cells. *Metabolism* 65, 54-63.  
811 Villar-Pazos, S., Martinez-Pinna, J., Castellano-Munoz, M., Alonso-Magdalena, P., Marroqui, L.,  
812 Quesada, I., Gustafsson, J.A., Nadal, A., 2017. Molecular mechanisms involved in the non-  
813 monotonic effect of bisphenol-a on ca<sup>2+</sup> entry in mouse pancreatic beta-cells. *Sci Rep* 7, 11770.  
814 Vinas, R., Watson, C.S., 2013. Bisphenol S disrupts estradiol-induced nongenomic signaling in a  
815 rat pituitary cell line: effects on cell functions. *Environ Health Perspect* 121, 352-358.  
816 Wetherill, Y.B., Akingbemi, B.T., Kanno, J., McLachlan, J.A., Nadal, A., Sonnenschein, C.,  
817 Watson, C.S., Zoeller, R.T., Belcher, S.M., 2007. In vitro molecular mechanisms of bisphenol A  
818 action. *Reprod Toxicol* 24, 178-198.  
819 Ye, X., Wong, L.Y., Kramer, J., Zhou, X., Jia, T., Calafat, A.M., 2015. Urinary Concentrations of  
820 Bisphenol A and Three Other Bisphenols in Convenience Samples of U.S. Adults during 2000-  
821 2014. *Environ Sci Technol* 49, 11834-11839.  
822 Zhang, Z., Hu, Y., Guo, J., Yu, T., Sun, L., Xiao, X., Zhu, D., Nakanishi, T., Hiromori, Y., Li, J.,  
823 Fan, X., Wan, Y., Cheng, S., Li, J., Guo, X., Hu, J., 2017. Fluorene-9-bisphenol is anti-oestrogenic  
824 and may cause adverse pregnancy outcomes in mice. *Nat Commun* 8, 14585.

825
